# Supplementary material
Source: Springer Nature journal article supplement (https://www.springermedizin.de/resource/supplementary/13063_2013_1534_MOESM5_ESM.pdf/9620226)
Supplement: MOESM5 [file 9620226]

**Example 1.**

| Patient                                                                                                     | Intervention              | Control                        | Outcomes                                                |
|-------------------------------------------------------------------------------------------------------------|---------------------------|--------------------------------|---------------------------------------------------------|
| Patients with reduced left ventricular function (<30%) after MI (narrow criteria)                           | Implantable defibrillator | Conventional medical treatment | Overall mortality at 2 years ( <i>narrow criteria</i> ) |
| Patients with reduced left ventricular function (ejection fraction not specified) after MI (broad criteria) |                           |                                |                                                         |
| Patients with reduced left ventricular function no other specified ( <i>broadest criteria</i> )             |                           |                                |                                                         |

**Example 2**

| Patient                                                                       | Intervention                       | Control                                  | Outcomes                                                                          |
|-------------------------------------------------------------------------------|------------------------------------|------------------------------------------|-----------------------------------------------------------------------------------|
| Adults with knee osteoarthritis (chronic and decompensated) (narrow criteria) | Ibuprofen cream (narrow criteria)  | Placebo (narrow criteria)                | Response rate (reduction of pain on motion, self-assessed on visual analog scale) |
| Patients with osteoarthritis (broad criteria)                                 | Any topical NSAID (broad criteria) | Placebo or no treatment (broad criteria) |                                                                                   |
| Patients with joint pain (broadest criteria)                                  |                                    |                                          |                                                                                   |

MI, myocardial infarction; NSAID, non-steroidal anti-inflammatory drug.
